# Supplementary material
Source: PubMed Central journal article supplement (PMC6834211)

# 1 IN 15 YOUNG ADULTS have high blood pressure

High blood pressure is dangerous for your body and can raise your risk of having serious health problems.

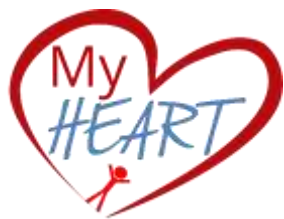

**Learn how you  
can protect your  
heart**

- FREE WEBSITE
- LEARN ABOUT HIGH BLOOD PRESSURE
- FIND HEALTHY CHOICES YOU CAN MAKE
- UP-TO-DATE RESOURCES YOU CAN TRUST

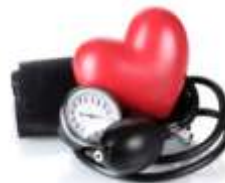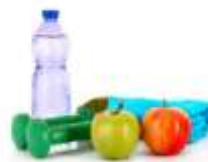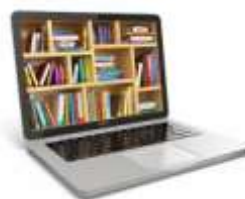

## MyHeartMyChoice.org

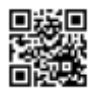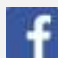

[@myheartmychoice.org](https://www.facebook.com/myheartmychoice.org)

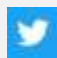

[@MyHeartMyChoice](https://twitter.com/MyHeartMyChoice)

## 1 IN 15 YOUNG ADULTS have high blood pressure

High blood pressure is dangerous for your body and can raise your risk of having serious health problems.

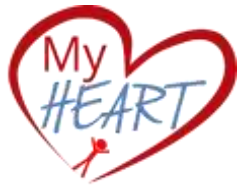

### Learn how you can protect your heart

- Free website
- Learn about high blood pressure
- Find healthy choices you can make
- Up-to-date resources you can trust

[MyHeartMyChoice.org](http://MyHeartMyChoice.org)

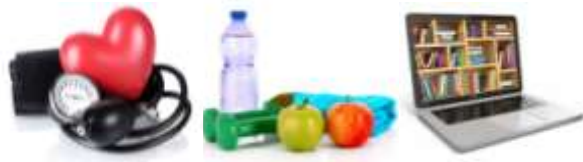

[www.MyHeartMyChoice.org](http://www.MyHeartMyChoice.org)

Approximately 1 in 15 young adults have high blood pressure, increasing their risk of a future heart attack, stroke, congestive heart failure, and/or kidney disease.

Young adults have trouble controlling their blood pressure. They have the lowest rates of blood pressure control (achieving a blood pressure <140/90 mmHg) compared to other adult age groups.

Our goal is to share information with young adults to help them live a healthier life, lower their blood pressure, and prevent heart disease.

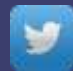

[@MyHeartMyChoice](https://twitter.com/MyHeartMyChoice)

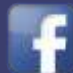

[@MyHeartMyChoice.org](https://www.facebook.com/MyHeartMyChoice.org)

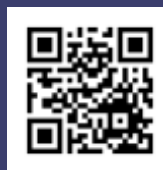

Supplement: cardio_v1i2e5_app3.pdf [file cardio_v1i2e5_app3.pdf]
